# Supplementary material for: A Mediterranean Diet Is Positively Associated with Bone and Muscle Health in a Non-Mediterranean Region in 25,450 Men and Women from EPIC-Norfolk
Source: PubMed Central journal article supplement (PMC7231007; doi:10.3390/nu12041154), 2020-04-21

**Table S1: Characteristics of participants' diets by quintile of Alternative Mediterranean Diet Score in 25,450 men and women aged 39-79 y**

|                                 | Q1               | Q2               | Q3               | Q4               | Q5               | P=    |
|---------------------------------|------------------|------------------|------------------|------------------|------------------|-------|
|                                 | n=5161           | n=4991           | n=5557           | n=4740           | n=5001           |       |
| aMED score, range               | 0-2              | 3                | 4                | 5                | 6-9              | -     |
| <b>Components of aMED score</b> |                  |                  |                  |                  |                  |       |
| Vegetables, g/d                 | 76.6 (74.7,78.5) | 97.2 (95.3,99.2) | 109 (107,111)    | 123 (121,125)    | 143 (141,145)    | <0.01 |
| Legumes, g/d                    | 7.31 (6.63,7.99) | 11.7 (11.0,12.4) | 14.3 (13.7,15.0) | 16.3 (15.6,17.0) | 20.2 (19.5,20.9) | <0.01 |
| Fruit, g/d                      | 86.1 (82.7,89.4) | 128 (125,131)    | 161 (158,164)    | 193 (190,197)    | 235 (232,239)    | <0.01 |
| Fish, g/d                       | 19.4 (18.4,20.4) | 31.6 (30.7,32.6) | 39.2 (38.3,40.1) | 45.6 (44.7,46.6) | 56.1 (55.2,57.1) | <0.01 |
| Nuts and seeds, g/d             | 0.51 (0.31,0.71) | 1.40 (1.20,1.60) | 2.00 (1.81,2.19) | 3.22 (3.02,3.43) | 5.22 (5.01,5.42) | <0.01 |
| Wholegrains, g/d                | 8.35 (7.24,9.45) | 17.2 (16.1,18.3) | 26.6 (25.5,27.6) | 36.4 (35.3,37.6) | 46.1 (45.0,47.2) | <0.01 |
| Red and processed meat, g/d     | 79.4 (78.3,80.5) | 68.4 (67.4,69.5) | 61.6 (60.6,62.6) | 54.6 (53.5,55.6) | 44.6 (43.5,45.6) | <0.01 |
| Dairy, g/d                      | 281 (276,285)    | 277 (272,281)    | 275 (271,279)    | 268 (264,272)    | 272 (267,276)    | <0.01 |
| Ratio MUFA: SFA                 | 0.84 (0.84,0.85) | 0.91 (0.91,0.92) | 0.94 (0.94,0.95) | 0.99 (0.98,0.99) | 1.04 (1.04,1.05) | <0.01 |
| Alcohol, g/d                    | 11.3 (10.8,11.7) | 12.0 (11.5,12.5) | 12.2 (11.8,12.6) | 12.2 (11.7,12.6) | 12.0 (11.5,12.4) | 0.05  |
| <b>Dietary intake</b>           |                  |                  |                  |                  |                  |       |
| Energy, kcal/d                  | 1934 (1930,1938) | 1937 (1934,1941) | 1942 (1938,1945) | 1945 (1941,1949) | 1947 (1943,1951) | <0.01 |
| Vitamin C, mg/d                 | 67.3 (65.9,68.6) | 78.8 (77.5,80.1) | 87.0 (85.8,88.3) | 97.2 (95.8,98.6) | 109 (108,111)    | <0.01 |
| Vitamin D, mcg/d                | 2.69 (2.63,2.76) | 3.06 (2.99,3.12) | 3.31 (3.25,3.37) | 3.56 (3.50,3.63) | 3.88 (3.82,3.95) | <0.01 |
| Magnesium, mg/d                 | 255 (253,257)    | 274 (272,276)    | 290 (289,292)    | 308 (306,310)    | 334 (332,335)    | <0.01 |
| Calcium, mg/d                   | 827 (821,833)    | 828 (822,834)    | 834 (828,839)    | 839 (832,845)    | 850 (844,856)    | <0.01 |
| Potassium, mg/d                 | 2888 (2872,2903) | 3064 (3049,3079) | 3199 (3185,3214) | 3336 (3321,3352) | 3543 (3528,3559) | <0.01 |
| Protein, %E                     | 15.0 (14.9,15.0) | 15.2 (15.1,15.3) | 15.4 (15.3,15.5) | 15.6 (15.5,15.6) | 15.8 (15.7,15.9) | <0.01 |
| Saturated fat, %E               | 14.6 (14.6,14.7) | 13.5 (13.4,13.6) | 12.8 (12.7,12.9) | 12.2 (12.1,12.2) | 11.3 (11.3,11.4) | <0.01 |
| Monounsaturated fat, %E         | 12.1 (12.0,12.2) | 12.0 (11.9,12.0) | 11.8 (11.8,11.9) | 11.7 (11.6,11.7) | 11.5 (11.5,11.6) | <0.01 |
| Polyunsaturated fat, %E         | 6.10 (6.05,6.15) | 6.40 (6.35,6.45) | 6.57 (6.52,6.61) | 6.68 (6.63,6.73) | 6.91 (6.86,6.95) | <0.01 |
| n-3 PUFA, g/d                   | 1.28 (1.27,1.30) | 1.44 (1.43,1.46) | 1.55 (1.54,1.57) | 1.66 (1.64,1.67) | 1.83 (1.81,1.84) | <0.01 |
| $\alpha$ -Linolenic acid, g/d   | 1.05 (1.04,1.06) | 1.13 (1.12,1.14) | 1.18 (1.17,1.19) | 1.22 (1.21,1.23) | 1.27 (1.26,1.28) | <0.01 |
| Eicosapentaenoic acid, g/d      | 0.06 (0.05,0.06) | 0.08 (0.08,0.09) | 0.10 (0.10,0.10) | 0.12 (0.12,0.13) | 0.16 (0.15,0.16) | <0.01 |
| Docosahexaenoic acid, g/d       | 0.07 (0.06,0.08) | 0.11 (0.11,0.12) | 0.14 (0.14,0.15) | 0.18 (0.17,0.18) | 0.24 (0.23,0.24) | <0.01 |

Values are adjusted means (95% CI), n=25450. Means were adjusted for sex, age, BMI, smoking, physical activity, number of days food diary completed and under-reporting of energy intake. aMED= Alternative Mediterranean Diet Score

**Table S2: Characteristics of participants' diets by quintile of Mediterranean Diet Score in 25,450 men and women aged 39-79 y**

|                                | Q1               | Q2               | Q3               | Q4               | Q5               | P=    |
|--------------------------------|------------------|------------------|------------------|------------------|------------------|-------|
|                                | n=3304           | n=4779           | n=5918           | n=5681           | n=5768           |       |
| MDS score, range               | 0-2              | 3                | 4                | 5                | 6-9              | -     |
| <b>Components of MDS score</b> |                  |                  |                  |                  |                  |       |
| Vegetables, g/d                | 78.0 (75.6,80.4) | 92.5 (90.6,94.5) | 104 (102,106)    | 118 (116,120)    | 139 (137,141)    | <0.01 |
| Legumes, g/d                   | 6.27 (5.43,7.10) | 10.2 (9.54,10.9) | 12.9 (12.3,13.5) | 15.6 (15.0,16.2) | 20.7 (20.1,21.4) | <0.01 |
| Fruit and nuts, g/d            | 94.0 (89.8,98.3) | 126 (123,130)    | 154 (151,157)    | 184 (180,187)    | 219 (216,222)    | <0.01 |
| Fish, g/d                      | 18.9 (17.7,20.1) | 27.1 (26.1,28.1) | 36.1 (35.3,37.0) | 44.1 (43.2,45.0) | 54.9 (54.0,55.8) | <0.01 |
| Cereals, g/d                   | 208 (205,211)    | 226 (223,228)    | 236 (234,239)    | 249 (247,251)    | 268 (266,270)    | <0.01 |
| Meat and eggs, g/d             | 160 (158,163)    | 141 (139,143)    | 129 (128,131)    | 115 (114,117)    | 101 (99.6,103)   | <0.01 |
| Dairy, g/d                     | 353 (347,358)    | 304 (300,308)    | 277 (274,281)    | 254 (250,258)    | 223 (219,227)    | <0.01 |
| Ratio MUFA: SFA                | 0.83 (0.83,0.84) | 0.89 (0.88,0.89) | 0.93 (0.93,0.94) | 0.98 (0.97,0.98) | 1.03 (1.03,1.04) | <0.01 |
| Alcohol, g/d                   | 10.7 (10.1,11.2) | 11.1 (10.6,11.5) | 12.1 (11.7,12.5) | 12.0 (11.6,12.4) | 13.1 (12.7,13.5) | <0.01 |
| <b>Dietary intake</b>          |                  |                  |                  |                  |                  |       |
| Energy, kcal/d                 | 1932 (1928,1937) | 1937 (1933,1941) | 1941 (1937,1944) | 1941 (1937,1945) | 1950 (1946,1954) | <0.01 |
| Vitamin C, mg/d                | 70.1 (68.4,71.7) | 77.8 (76.4,79.2) | 85.2 (83.9,86.4) | 92.6 (91.3,93.8) | 104 (103,105)    | <0.01 |
| Vitamin D, mcg/d               | 2.79 (2.71,2.87) | 2.99 (2.93,3.06) | 3.23 (3.17,3.28) | 3.40 (3.34,3.46) | 3.80 (3.74,3.86) | <0.01 |
| Magnesium, mg/d                | 269 (267,272)    | 277 (275,279)    | 288 (286,290)    | 297 (295,299)    | 316 (314,318)    | <0.01 |
| Calcium, mg/d                  | 886 (879,893)    | 851 (844,857)    | 836 (830,841)    | 822 (816,828)    | 807 (801,813)    | <0.01 |
| Potassium, mg/d                | 3018 (2998,3038) | 3083 (3066,3099) | 3168 (3153,3183) | 3249 (3234,3264) | 3398 (3383,3413) | <0.01 |
| Protein, %E                    | 15.5 (15.4,15.6) | 15.3 (15.3,15.4) | 15.4 (15.3,15.4) | 15.3 (15.3,15.4) | 15.4 (15.3,15.5) | 0.19  |
| Saturated fat, %E              | 14.9 (14.8,15.0) | 13.9 (13.8,13.9) | 13.1 (13.0,13.1) | 12.3 (12.3,12.4) | 11.3 (11.3,11.4) | <0.01 |
| Monounsaturated fat, %E        | 12.2 (12.1,12.2) | 12.0 (12.0,12.1) | 11.9 (11.8,11.9) | 11.8 (11.7,11.8) | 11.4 (11.4,11.5) | <0.01 |
| Polyunsaturated fat, %E        | 5.78 (5.72,5.84) | 6.23 (6.18,6.28) | 6.49 (6.45,6.54) | 6.75 (6.71,6.80) | 7.02 (6.97,7.06) | <0.01 |
| n-3 PUFA, g/d                  | 1.30 (1.28,1.32) | 1.41 (1.39,1.42) | 1.51 (1.50,1.52) | 1.62 (1.60,1.63) | 1.78 (1.77,1.80) | <0.01 |
| $\alpha$ -Linolenic acid, g/d  | 1.06 (1.05,1.07) | 1.12 (1.11,1.13) | 1.15 (1.15,1.16) | 1.21 (1.20,1.22) | 1.26 (1.25,1.26) | <0.01 |
| Eicosapentaenoic acid, g/d     | 0.06 (0.05,0.06) | 0.07 (0.07,0.08) | 0.10 (0.09,0.10) | 0.11 (0.11,0.12) | 0.15 (0.15,0.16) | <0.01 |
| Docosahexaenoic acid, g/d      | 0.07 (0.07,0.08) | 0.10 (0.10,0.11) | 0.14 (0.13,0.14) | 0.16 (0.16,0.17) | 0.22 (0.22,0.23) | <0.01 |

Values are adjusted means (95% CI), n=25450. Means were adjusted for sex, age, BMI, smoking, physical activity, number of days food diary completed and under-reporting of energy intake. MDS= Mediterranean Diet Score.

**Table S3: Fat free mass (kg) by quintile of Alternative Mediterranean Diet Score and Mediterranean Diet Score in 14,720 men and women aged 42-82 y, stratified by sex<sup>1</sup>**

| Sex          | Quintile | aMED  |                   | MDS   |                   |
|--------------|----------|-------|-------------------|-------|-------------------|
|              |          | n=    | Mean (95% CI)     | n=    | Mean (95% CI)     |
| <b>All</b>   | Q1       | 2711  | 49.3 (49.1,49.5)  | 1852  | 49.1 (48.9,49.4)  |
|              | Q2       | 2848  | 49.6 (49.4,49.8)  | 2668  | 49.5 (49.3,49.7)  |
|              | Q3       | 3212  | 50.0 (49.8,50.1)  | 3446  | 49.9 (49.7,50.1)  |
|              | Q4       | 2914  | 50.0 (49.8,50.1)  | 3314  | 49.9 (49.7,50.1)  |
|              | Q5       | 3035  | 50.3 (50.1,50.4)  | 3440  | 50.4 (50.2,50.5)  |
|              | Q5-Q1    |       | 0.92 (0.65, 1.19) |       | 1.21 (0.92, 1.51) |
|              | P=       | <0.01 |                   | <0.01 |                   |
| <b>Men</b>   | Q1       | 1155  | 61.3 (61.0,61.6)  | 749   | 61.0 (60.6,61.3)  |
|              | Q2       | 1208  | 61.5 (61.3,61.8)  | 1123  | 61.4 (61.1,61.7)  |
|              | Q3       | 1423  | 61.7 (61.5,62.0)  | 1497  | 61.7 (61.5,62.0)  |
|              | Q4       | 1299  | 61.9 (61.6,62.2)  | 1486  | 61.8 (61.5,62.1)  |
|              | Q5       | 1361  | 62.1 (61.8,62.4)  | 1591  | 62.3 (62.0,62.5)  |
|              | Q5-Q1    |       | 0.79 (0.37, 1.21) |       | 1.31 (0.85, 1.77) |
|              | P=       | <0.01 |                   | <0.01 |                   |
| <b>Women</b> | Q1       | 1556  | 40.1 (39.8,40.3)  | 1103  | 40.0 (39.7,40.3)  |
|              | Q2       | 1640  | 40.3 (40.1,40.6)  | 1545  | 40.2 (40.0,40.4)  |
|              | Q3       | 1789  | 40.8 (40.5,41.0)  | 1949  | 40.7 (40.5,40.9)  |
|              | Q4       | 1615  | 40.7 (40.5,40.9)  | 1828  | 40.6 (40.4,40.9)  |
|              | Q5       | 1674  | 41.0 (40.8,41.2)  | 1849  | 41.0 (40.8,41.2)  |
|              | Q5-Q1    |       | 0.95 (0.62, 1.29) |       | 0.96 (0.60, 1.32) |
|              | P=       | <0.01 |                   | <0.01 |                   |

<sup>1</sup>Values are adjusted means (95% CI), n=14815. Means were adjusted for sex, age, BMI, smoking, physical activity, family history of osteoporosis, calcium intakes, supplement use (vitamin D or calcium), medication use (corticosteroids, aspirin or hormone replacement therapy), menopausal status, days of dietary intake data and the ratio of energy intake to estimated energy requirements. P values are for trends calculated using ANCOVA. aMED= Alternative Mediterranean Diet Score; MDS = Mediterranean Diet Score.

**Table S4: Measures of broadband ultrasound attenuation, velocity of sound and fat free mass by quintile of alternative Mediterranean Diet Score in 14,815 men and women aged 42-82 y, stratified by sex<sup>1</sup>**

| Sex          | Quintile | BUA (dB/MHz) |                    | VOS (m/s) |                   | FFM <sup>BMI</sup> (kg/[kg/m <sup>2</sup> ]) |                   |
|--------------|----------|--------------|--------------------|-----------|-------------------|----------------------------------------------|-------------------|
|              |          | n=           | Mean (95% CI)      | n=        | Mean (95% CI)     | n=                                           | Mean (95% CI)     |
| <b>All</b>   | Q1       | 2725         | 79.3 (78.6,80.0)   | 2725      | 1631 (1630,1633)  | 2711                                         | 1.85 (1.83,1.87)  |
|              | Q2       | 2865         | 79.0 (78.3,79.7)   | 2865      | 1632 (1630,1633)  | 2848                                         | 1.87 (1.85,1.89)  |
|              | Q3       | 3240         | 80.3 (79.7,81.0)   | 3240      | 1635 (1633,1636)  | 3212                                         | 1.90 (1.88,1.92)  |
|              | Q4       | 2928         | 80.2 (79.5,80.9)   | 2928      | 1634 (1633,1636)  | 2914                                         | 1.91 (1.89,1.93)  |
|              | Q5       | 3057         | 80.7 (80.0,81.4)   | 3057      | 1636 (1634,1637)  | 3035                                         | 1.94 (1.92,1.96)  |
|              | Q5-Q1    |              | 1.42 (0.43, 2.41)  |           | 4.41 (2.27, 6.55) |                                              | 0.09 (0.07, 0.11) |
|              | P=       |              | <0.01              |           | <0.01             |                                              | <0.01             |
| <b>Men</b>   | Q1       | 1157         | 89.8 (88.8,90.8)   | 1157      | 1643 (1641,1645)  | 1155                                         | 2.29 (2.28,2.31)  |
|              | Q2       | 1213         | 89.5 (88.5,90.5)   | 1213      | 1643 (1641,1646)  | 1208                                         | 2.30 (2.29,2.32)  |
|              | Q3       | 1442         | 90.0 (89.1,90.9)   | 1442      | 1645 (1643,1648)  | 1423                                         | 2.31 (2.30,2.33)  |
|              | Q4       | 1303         | 90.3 (89.4,91.3)   | 1303      | 1646 (1643,1648)  | 1299                                         | 2.33 (2.32,2.34)  |
|              | Q5       | 1375         | 90.6 (89.7,91.6)   | 1375      | 1648 (1646,1650)  | 1361                                         | 2.35 (2.34,2.36)  |
|              | Q5-Q1    |              | 0.86 (-0.51, 2.23) |           | 4.99 (1.87, 8.11) |                                              | 0.06 (0.04, 0.08) |
|              | P=       |              | 0.10               |           | <0.01             |                                              | <0.01             |
| <b>Women</b> | Q1       | 1568         | 71.6 (70.7,72.4)   | 1568      | 1623 (1621,1625)  | 1556                                         | 1.52 (1.51,1.54)  |
|              | Q2       | 1652         | 71.3 (70.5,72.1)   | 1652      | 1623 (1621,1625)  | 1640                                         | 1.55 (1.54,1.56)  |
|              | Q3       | 1798         | 72.6 (71.8,73.3)   | 1798      | 1626 (1624,1628)  | 1789                                         | 1.57 (1.56,1.59)  |
|              | Q4       | 1625         | 72.2 (71.4,73.0)   | 1625      | 1625 (1623,1627)  | 1615                                         | 1.57 (1.56,1.59)  |
|              | Q5       | 1682         | 72.6 (71.8,73.4)   | 1682      | 1626 (1624,1627)  | 1674                                         | 1.61 (1.59,1.62)  |
|              | Q5-Q1    |              | 1.05 (-0.08, 2.18) |           | 2.99 (0.23, 5.76) |                                              | 0.08 (0.06, 0.10) |
|              | P=       |              | 0.02               |           | 0.01              |                                              | <0.01             |

<sup>1</sup>Values are unadjusted means (95% CI), n=14815. P values are for trends calculated using ANCOVA. BUA=Broadband ultrasound attenuation; VOS = velocity of sound; FFM<sup>BMI</sup> =Fat free mass adjusted for BMI.

**Table S5: Measures of broadband ultrasound attenuation, velocity of sound and fat free mass by quintile of Mediterranean Diet Score in 14,815 men and women aged 42-82 y, stratified by sex<sup>1</sup>**

| Sex          | Quintile | BUA (dB/MHz) |                    | VOS (m/s) |                   | FFM <sup>BMI</sup> (kg/[kg/m <sup>2</sup> ]) |                   |
|--------------|----------|--------------|--------------------|-----------|-------------------|----------------------------------------------|-------------------|
|              |          | n=           | Mean (95% CI)      | n=        | Mean (95% CI)     | n=                                           | Mean (95% CI)     |
| <b>All</b>   | Q1       | 1872         | 78.5 (77.6,79.3)   | 1872      | 1630 (1628,1632)  | 1852                                         | 1.84 (1.82,1.86)  |
|              | Q2       | 2669         | 79.4 (78.7,80.2)   | 2669      | 1633 (1631,1635)  | 2668                                         | 1.87 (1.85,1.89)  |
|              | Q3       | 3468         | 79.7 (79.0,80.3)   | 3468      | 1633 (1632,1634)  | 3446                                         | 1.89 (1.88,1.91)  |
|              | Q4       | 3350         | 80.3 (79.6,80.9)   | 3350      | 1635 (1633,1636)  | 3314                                         | 1.91 (1.89,1.92)  |
|              | Q5       | 3456         | 81.1 (80.4,81.7)   | 3456      | 1636 (1635,1637)  | 3440                                         | 1.94 (1.92,1.96)  |
|              | Q5-Q1    |              | 2.61 (1.54, 3.69)  |           | 6.41 (4.08, 8.73) |                                              | 0.10 (0.07, 0.13) |
|              | P=       |              | <0.01              |           | <0.01             |                                              | <0.01             |
| <b>Men</b>   | Q1       | 754          | 88.9 (87.6,90.1)   | 754       | 1642 (1639,1645)  | 749                                          | 2.29 (2.28,2.31)  |
|              | Q2       | 1122         | 90.0 (89.0,91.1)   | 1122      | 1645 (1643,1647)  | 1123                                         | 2.30 (2.29,2.32)  |
|              | Q3       | 1511         | 90.3 (89.4,91.2)   | 1511      | 1646 (1644,1648)  | 1497                                         | 2.32 (2.30,2.33)  |
|              | Q4       | 1504         | 89.6 (88.7,90.4)   | 1504      | 1644 (1642,1646)  | 1486                                         | 2.32 (2.31,2.33)  |
|              | Q5       | 1599         | 90.9 (90.0,91.7)   | 1599      | 1648 (1646,1650)  | 1591                                         | 2.34 (2.33,2.35)  |
|              | Q5-Q1    |              | 2.03 (0.51, 3.55)  |           | 5.87 (2.41, 9.32) |                                              | 0.04 (0.02, 0.07) |
|              | P=       |              | 0.05               |           | 0.01              |                                              | <0.01             |
| <b>Women</b> | Q1       | 1118         | 71.5 (70.5,72.4)   | 1118      | 1621 (1619,1624)  | 1103                                         | 1.53 (1.51,1.55)  |
|              | Q2       | 1547         | 71.8 (70.9,72.6)   | 1547      | 1624 (1622,1626)  | 1545                                         | 1.55 (1.54,1.56)  |
|              | Q3       | 1957         | 71.5 (70.7,72.2)   | 1957      | 1623 (1621,1625)  | 1949                                         | 1.56 (1.55,1.58)  |
|              | Q4       | 1846         | 72.7 (72.0,73.5)   | 1846      | 1627 (1625,1629)  | 1828                                         | 1.57 (1.56,1.58)  |
|              | Q5       | 1857         | 72.6 (71.9,73.4)   | 1857      | 1626 (1624,1628)  | 1849                                         | 1.60 (1.58,1.61)  |
|              | Q5-Q1    |              | 1.18 (-0.05, 2.40) |           | 4.54 (1.56, 7.53) |                                              | 0.07 (0.05, 0.09) |
|              | P=       |              | 0.01               |           | <0.01             |                                              | <0.01             |

<sup>1</sup>Values are unadjusted means (95% CI), n=14815. P values are for trends calculated using ANCOVA. BUA=Broadband ultrasound attenuation; VOS = velocity of sound; FFM<sup>BMI</sup> =Fat free mass adjusted for BMI.

Figure S1: Total fracture risk after a mean follow up of 17.6 years by quintile of alternative Mediterranean Diet Score and Mediterranean Diet Score in 8351 post-menopausal women aged 40-78 y.

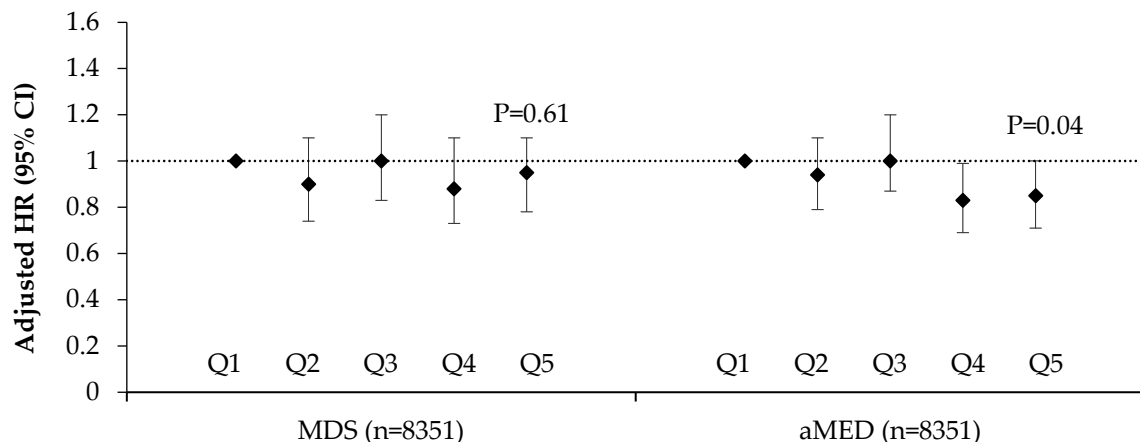

Values are adjusted hazard ratios (95% CI), n=25,450. Ratios were adjusted for age, BMI, smoking, physical activity, family history of osteoporosis, calcium intakes, supplement use (vitamin D or calcium), medication use (corticosteroids, aspirin or hormone replacement therapy), days of dietary intake data and the ratio of energy intake to estimated energy requirements. P values are for trends calculated using Cox proportional hazards model. Participant numbers (cases) per quintile were as follows; MDS: Q1= 1158 (188), Q2= 1679 (245), Q3= 1968 (327), Q4= 1833 (268), Q5= 1713 (260); aMED: Q1= 1769 (287), Q2= 1711 (262), Q3= 1816 (307), Q4= 1534 (215), Q5= 1521 (217). aMED= alternative Mediterranean Diet Score, MDS= Mediterranean Diet Score.

**Figure S2: Total fracture risk after a mean follow up of 17.6 years by quintile of aMED and MDS in 25,450 men and women aged 39-79 y.** Values are unadjusted hazard ratios (95% CI), n=25,450. P values are for trends calculated using Cox proportional hazards model. Participant numbers (cases) per quintile were as follows; (a) aMED all participants: Q1= 5161 (481), Q2= 4991 (430), Q3= 5557 (515), Q4= 4740 (396), Q5= 5001 (373) (b) MDS all participants: Q1= 3304 (317), Q2= 4779 (416), Q3= 5918 (528), Q4= 5681 (494), Q5= 5768 (440). aMED= alternative Mediterranean Diet Score, MDS= Mediterranean Diet Score.

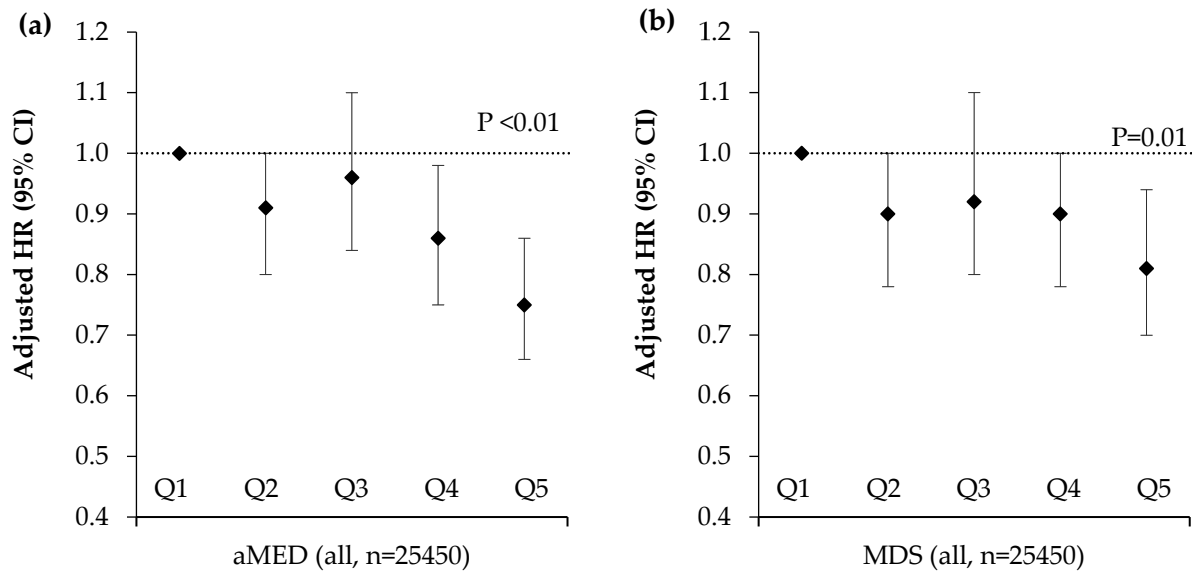

Supplement: nutrients-12-01154-s001.pdf [file nutrients-12-01154-s001.pdf]
